# Supplementary material
Source: PubMed Central journal article supplement (PMC8373252)
Supplement: jcm.00860-21-s0001.pdf [file jcm.00860-21-s0001.pdf]

**Supplemental Table 1: Baseline Characteristics by Meningitis Diagnosis**

| <b>Variable</b>           | <b>With Cryptococcal<br/>Meningitis</b> | <b>Without Cryptococcal<br/>Meningitis</b> |
|---------------------------|-----------------------------------------|--------------------------------------------|
| N per group               | 60 (69%)                                | 27 (31%)                                   |
| Women                     | 21 (35%)                                | 7 (26%)                                    |
| Age, years                | 37 [ $\pm$ 10]                          | 35 [ $\pm$ 11]                             |
| Weight, kg                | 54 [ $\pm$ 10]                          | 53 [ $\pm$ 9]                              |
| Receiving HIV therapy     | 18 (30%)                                | 8 (30%)                                    |
| CD4 count, cells/ $\mu$ L | 20 [10–52]<br>(n=42)                    | 130 [57–390]<br>(n=10)                     |

Data are N (%), mean [ $\pm$ SD], and median [IQR]. CD4 counts were not available for all participants. Diagnosis made by composite of CSF CrAg LFA and/or CSF Culture.
